# Supplementary material for: Optical control of ERK and AKT signaling promotes axon regeneration and functional recovery of PNS and CNS in Drosophila
Source: eLife. 2020 Oct 6;9:e57395. doi: 10.7554/eLife.57395 (PMC7567606; doi:10.7554/eLife.57395)
Supplement: Figure 1—figure supplement 1—source data 1. [file elife-57395-fig1-figsupp1-data1.xlsx]

## Sheet: Figure1 Supplement 1_D
Time (min)	Norm. P/C Ratio
0.5	0.0539
1	0.1687
1.5	0.2547
2	0.2992
2.5	0.564
3	0.4455
3.5	0.6276
4	0.5417
4.5	0.6822
5	0.7457
5.5	0.7233
6	0.7156
6.5	0.7043
7	0.5648
7.5	0.9059
8	0.839
8.5	1
9	0.8643
9.5	0.8017
10	0.8157
10.5	0.6561
11	0.5784
11.5	0.2744
12	0.2083
12.5	0.336
13	0.1664
13.5	0.0824
14	0.1364
14.5	0
15	0.1416
15.5	0.2402
16	0.3887
16.5	0.673
17	0.4443
17.5	0.7604
18	0.8184
18.5	0.6704
19	0.8376
19.5	0.8827
20	0.817
20.5	0.9482
21	0.8512
21.5	0.7312
22	0.7431
22.5	0.9148
23	0.9615
23.5	1
24	0.9093
24.5	0.4884
25	0.5943
25.5	0.3442
26	0.3921
26.5	0.3217
27	0.1541
27.5	0.1348
28	0.0736
28.5	0.0706
29	0
29.5	0.0708
30	0
30.5	0.1124
31	0.2817
31.5	0.6056
32	0.345
32.5	0.7052
33	0.7714
33.5	0.6027
34	0.7932
34.5	0.8446
35	0.7697
35.5	0.9193
36	0.8087
36.5	0.6719
37	0.6855
37.5	0.8417
38	0.8595
38.5	0.751
39	1
39.5	0.5095
40	0.3953
40.5	0.4499
41	0.4501
41.5	0.4084
42	0.2344
42.5	0.247
43	0.1184
43.5	0.0655
44	0.0557
44.5	0.1991
45	0.4407
45.5	0.5444
46	0.6062
46.5	0.7454
47	0.8285
47.5	0.9283
48	0.6349
48.5	0.8109
49	0.7135
49.5	0.7001
50	0.7421
50.5	0.8817
51	0.7232
51.5	1
52	0.9763
52.5	0.8777
53	0.5505
53.5	0.5974
54	0.4377
54.5	0.4487
55	0.4399
55.5	0.4516
56	0.2497
56.5	0.3298
57	0
57.5	0.2625
58	0.1311
58.5	0.1897
59	0.1187
59.5	0.5167
60	0.7094
60.5	0.8138
61	0.9209
61.5	0.9571
62	0.9007
62.5	1
63	0.8561
63.5	0.8428
64	0.8053
64.5	0.7599
65	0.9496
65.5	0.7488
66	0.6891
66.5	0.6529
67	0.2754
67.5	0.1153
68	0.2854
68.5	0.4465
69	0.1418
69.5	0.2581
70	0.1109
70.5	0.2063
71	0.2379
71.5	0.2379
72	0
