# Supplementary material for: Optical control of ERK and AKT signaling promotes axon regeneration and functional recovery of PNS and CNS in Drosophila
Source: eLife. 2020 Oct 6;9:e57395. doi: 10.7554/eLife.57395 (PMC7567606; doi:10.7554/eLife.57395)
Supplement: Figure 1—source data 1. [file elife-57395-fig1-data1.xlsx]

## Sheet: Figure 1G
OptoRaf activation
		Time	0	5	10	20	60
	Nor. Phos. Level	Set 1	0	0.724887	0.858882	0.801654	0.47088
		Set 2	0.0256507	0.999637	0.967875	0.52709	0.471158
		Set 3	0.014506	0.715489	0.609552	0.789452	0.614965
		Average	0.0133856	0.813338	0.812103	0.706065	0.519001
		STED	0.012862	0.161408	0.183684	0.155117	0.0831075
		STED/2	0.006431	0.0807042	0.0918422	0.0775587	0.0415537
OptoRaf inactivation
		Time	0	5	10	20	60
	Nor. Phos. Level	Set 1	1.00028	0.577887	0.264522	0.0206981	0.0653459
		Set 2	0.960189	0.606815	0.31059	0.0335721	0.00013204
		Set 3	0.785409	1.00054	0.763001	0.162371	0.000308662
		Average	0.915293	0.728414	0.446038	0.0722136	0.0219289
		STED	0.114255	0.236112	0.275463	0.0783431	0.0376004
		STED/2	0.0571273	0.118056	0.137731	0.0391716	0.0188002
OptoAKT activation
		Time	0	5	10	20	60
	Nor. Phos. Level	Set 1	-0.000207103	0.6449	0.833913	1.00016	0.999783
		Set 2	0.0540898	0.577985	0.843315	0.635544	0.819925
		Set 3	0.000305139	0.262083	0.540227	0.655548	1.0004
		Average	0.0180626	0.494989	0.739152	0.76375	0.940037
		STED	0.0312015	0.204459	0.172338	0.204979	0.104021
		STED/2	0.0156008	0.102229	0.086169	0.102489	0.0520104
OptoAKT inactivation
		Time	0	5	10	20	60
	Nor. Phos. Level	Set 1	0.99852	0.286896	0.588675	-6.06176e-05	0.193576
		Set 2	0.967199	0.931868	0.384716	0.122902	0.0333529
		Set 3	0.999688	0.639362	0.395331	0.205933	-0.000413642
		Average	0.741352	1.71453	2.84218	5.08219	15.0566
		STED	0.0184298	0.32295	0.114814	0.10364	0.103637
		STED/2	0.00921492	0.161475	0.057407	0.0518199	0.0518185

## Sheet: Figure 1I
	endo akt		exo akt		erk
	d	l	d	l	d	l
opto akt	1	0.826581	1	4.611	1	1.10183
		0.788666		4.01595		1.09249
		1.20324		4.0022		0.769709
average		0.939495		4.20972		0.988009
sted		0.229193		0.347591		0.189111
		0.114597		0.173796		0.0945555
	1	0.789254			1	5.41108
opto raf		0.871344				3.13621
		0.835781				3.87459
average		0.832126				4.14063
sted		0.0411665		sted		1.16053
		0.0205832				0.580265

## Sheet: Figure 1L
			PC12 NS1 cells, 24WP duplicate, 24h of 500uW blue light
			Well1					Well 2					Well1					Well 2
			Diff	Undiff	Total	Diff/total		Diff	Undiff	Total	Diff/total		Diff	Undiff	Total	Diff/total		Diff	Undiff	Total	Diff/total
		OptoRaf1	29	75	104	0.278846		13	54	67	0.19403		56	47	103	0.543689		69	71	140	0.492857
		OptoAKT	39	162	201	0.19403		29	79	108	0.268519		52	229	281	0.185053		48	172	220	0.218182
		Raf1GFPcaaX	168	92	260	0.646154		165	84	249	0.662651		226	132	358	0.631285		177	101	278	0.636691
		CIBN2-GFP-CAAX	56	213	269	0.208178		19	85	104	0.182692		48	319	367	0.13079		10	64	74	0.135135
			Diff/total	Diff/total	Avg	SD		Diff/total	Diff/total	Avg	SD
		OptoRaf1	0.278846	0.19403	0.236438	0.0424082		0.543689	0.492857	0.518273	0.0254161
		OptoAKT	0.19403	0.268519	0.231274	0.0372443		0.185053	0.218182	0.201618	0.0165642
		Raf1GFPcaaX	0.646154	0.662651	0.654402	0.00824838		0.631285	0.636691	0.633988	0.00270287
		CIBN2-GFP-CAAX	0.208178	0.182692	0.195435	0.0127431		0.13079	0.135135	0.132963	0.00217247
