# Supplementary material for: Optical control of ERK and AKT signaling promotes axon regeneration and functional recovery of PNS and CNS in Drosophila
Source: eLife. 2020 Oct 6;9:e57395. doi: 10.7554/eLife.57395 (PMC7567606; doi:10.7554/eLife.57395)
Supplement: Figure 2—figure supplement 1—source data 1. [file elife-57395-fig2-figsupp1-data1.xlsx]

## Sheet: Sheet1
	Figure2 supplement 2B	optoRaf (0-min)	optoRaf (5-min)	optoRaf (10-min)	optoRaf (15-min)
		0.772158	1.12682	2.01267	2.59587
		1.38187	2.28982	1.29829	2.52162
		0.401061	1.65145	1.98556	1.52943
		0.854635	1.34659	2.05902	1.91481
		1.45688	0.949439	1.83449	2.23174
		1.82592	1.0013	1.92007	2.57393
		1.08899	0.987972	1.57388	2.80001
		0.815201	1.46254	2.34714	3.52818
		1.22438	1.75211	1.64198	1.86726
		1.20223	1.11124	2.27488	1.76193
		1.34108	2.04118	1.8607	1.99433
		0.808035	1.14135	1.62359	2.36468
		0.782881	1.42922	1.51801	2.21932
		0.864557	1.55058	2.03071	2.06984
		0.657512	1.81319	1.55424	1.96853
		0.47016	1.29819	1.37104	3.31818
		0.827778	0.849925	1.54893
		0.865809	1.60455	1.25855
		1.07761	1.85298
		1.28125	1.26026
			1.47116
		Mean	SEM	N
	optoRaf (0-min)	1	0.07866	20
	optoRaf (5-min)	1.428	0.08332	21
	optoRaf (10-min)	1.762	0.07578	18
	optoRaf (15-min)	2.329	0.1367	16
	ANOVA table	SS	DF	MS	F (DFn, DFd)	P value
	Treatment (between columns)	16.77	3	5.591	F (3, 71) = 34.50	P < 0.0001
	Residual (within columns)	11.51	71	0.1621
	Total	28.28	74
	Dunnett's multiple comparisons test	Mean Diff.	95.00% CI of diff.	Significant?	Summary
	optoRaf (0-min) vs. optoRaf (5-min)	-0.4282	-0.7301 to -0.1262	Yes	**
	optoRaf (0-min) vs. optoRaf (10-min)	-0.7619	-1.076 to -0.4479	Yes	****
	optoRaf (0-min) vs. optoRaf (15-min)	-1.329	-1.653 to -1.005	Yes	****
	Test details	Mean 1	Mean 2	Mean Diff.	SE of diff.	n1	n2	q	DF
	optoRaf (0-min) vs. optoRaf (5-min)	1	1.428	-0.4282	0.1258	20	21	3.404	71
	optoRaf (0-min) vs. optoRaf (10-min)	1	1.762	-0.7619	0.1308	20	18	5.825	71
	optoRaf (0-min) vs. optoRaf (15-min)	1	2.329	-1.329	0.135	20	16	9.84	71
	Figure2 supplement 2D	optoAKT (0-min)	optoAKT (5-min)	optoAKT (10-min)	optoAKT (15-min)
		0.654684	1.32191	1.2355	2.80253
		0.448767	2.20063	1.83357	1.21756
		1.3247	1.45919	1.77782	1.64612
		0.6235	0.507998	1.94942	1.71023
		1.47887	1.04126	1.33149	1.7996
		1.76092	0.785342	0.878196	1.50779
		0.298771	1.01182	1.70953	2.75723
		0.783425	1.65762	2.05516	2.40237
		0.635521	2.16439	2.18338	2.86298
		0.863388	1.14125	2.16736	1.55344
		1.00589	1.23602	2.64835	2.55375
		0.901366	0.917045	1.474	0.879938
		1.41163	1.51006	1.4517	1.39787
		1.72486	0.556429	1.93409	1.11251
		1.04056	0.865304	1.25989	1.87242
		0.674544	1.27696	0.748235	1.35658
		1.3686	1.51197	2.21039	1.04265
			1.84698
		Mean	SEM	N
	optoAKT (0-min)	1	0.107	17
	optoAKT (5-min)	1.278	0.1151	18
	optoAKT (10-min)	1.697	0.123	17
	optoAKT (15-min)	1.793	0.1576	17
	ANOVA table	SS	DF	MS	F (DFn, DFd)	P value
	Treatment (between columns)	6.998	3	2.333	F (3, 65) = 8.404	P < 0.0001
	Residual (within columns)	18.04	65	0.2776
	Total	25.04	68
	Dunnett's multiple comparisons test	Mean Diff.	95.00% CI of diff.	Significant?	Summary
	optoAKT (0-min) vs. optoAKT (5-min)	-0.2785	-0.7070 to 0.1501	No	ns
	optoAKT (0-min) vs. optoAKT (10-min)	-0.6969	-1.132 to -0.2623	Yes	***
	optoAKT (0-min) vs. optoAKT (15-min)	-0.7927	-1.227 to -0.3580	Yes	***
	Test details	Mean 1	Mean 2	Mean Diff.	SE of diff.	n1	n2	q	DF
	optoAKT (0-min) vs. optoAKT (5-min)	1	1.278	-0.2785	0.1782	17	18	1.563	65
	optoAKT (0-min) vs. optoAKT (10-min)	1	1.697	-0.6969	0.1807	17	17	3.857	65
	optoAKT (0-min) vs. optoAKT (15-min)	1	1.793	-0.7927	0.1807	17	17	4.387	65
