# Supplementary material for: Optical control of ERK and AKT signaling promotes axon regeneration and functional recovery of PNS and CNS in Drosophila
Source: eLife. 2020 Oct 6;9:e57395. doi: 10.7554/eLife.57395 (PMC7567606; doi:10.7554/eLife.57395)
Supplement: Figure 2—source data 1. [file elife-57395-fig2-data1.xlsx]

## Sheet: Sheet1
	Figure 2C	WT (0-min off)	optoRaf (0-min off)	optoRaf (15-min off)	optoRaf (45-min off)	optoRaf (dark)	optoAKT (0-min off)
		0.946191	4.88931	3.40721	2.91779	2.5802	0.942448
		0.427436	4.05159	4.15814	1.68946	2.8108	1.01479
		0.422822	4.16032	5.37951	2.46711	2.32513	1.20178
		1.2487	4.10826	4.91133	1.88176	2.39538	0.88682
		1.02855	3.85572	3.88993	3.27741	1.86339	1.38077
		0.771038	5.33711	5.55875	3.08059	1.82848	1.05196
		0.786621	3.42001	5.14168	2.77476	1.3415	0.948629
		1.38721	6.63535	4.12149	3.12228	2.40078	0.983015
		1.16531	3.49192	4.28472	2.41288	0.696781	1.46982
		0.928955	5.55614	3.37779	2.23346	1.4848	0.570466
		0.69504	6.02336	4.18844	2.65532	2.5311	0.705313
		0.774434	8.55403	3.91204	3.75691	3.17225	1.48575
		0.581173	4.9956	4.33286	3.94878	1.89195	0.203097
		1.13136	3.1975	3.39938	3.33966	1.41628	1.80002
		1.58717	3.34314	4.73461	4.36785	2.12717	1.9212
		1.31896	7.41562	3.49035	2.66978	1.28231	0.758764
		1.43448		3.02417	3.3226	2.72236	1.0631
		1.07851		2.49654	3.17269	2.37606	1.44475
		1.28605		4.50644			0.802378
		Mean	SEM	N
	WT (0-min off)	1	0.07773	19
	optoRaf (0-min off)	4.94	0.3928	16
	optoRaf (15-min off)	4.122	0.1861	19
	optoRaf (45-min off)	2.95	0.1629	18
	optoRaf (dark)	2.069	0.151	18
	optoAKT (0-min off)	1.086	0.097	19
	ANOVA table	SS	DF	MS	F (DFn, DFd)	P value
	Treatment (between columns)	230.9	5	46.18	F (5, 103) = 68.68	P < 0.0001
	Residual (within columns)	69.26	103	0.6724
	Total	300.2	108
	Dunnett's multiple comparisons test	Mean Diff.	95.00% CI of diff.	Significant?	Summary
	optoRaf (dark) vs. WT (0-min off)	1.069	0.3808 to 1.758	Yes	***
	optoRaf (dark) vs.optoRaf (0-min off)	-2.87	-3.590 to -2.151	Yes	****
	optoRaf (dark) vs. optoRaf (15-min off)	-2.053	-2.741 to -1.364	Yes	****
	optoRaf (dark) vs. optoRaf (45-min off)	-0.8802	-1.578 to -0.1825	Yes	**
	optoRaf (dark) vs. optoAKT (0-min off)	0.9832	0.2948 to 1.672	Yes	**
	Test details	Mean 1	Mean 2	Mean Diff.	SE of diff.	n1	n2	q	DF
	optoRaf (dark) vs. WT (0-min off)	2.069	1	1.069	0.2697	18	19	3.964	103
	optoRaf (dark) vs. optoRaf (0-min off)	2.069	4.94	-2.87	0.2817	18	16	10.19	103
	optoRaf (dark) vs. optoRaf (15-min off)	2.069	4.122	-2.053	0.2697	18	19	7.61	103
	optoRaf (dark) vs. optoRaf (45-min off)	2.069	2.95	-0.8802	0.2733	18	18	3.22	103
	optoRaf (dark) vs. optoAKT (0-min off)	2.069	1.086	0.9832	0.2697	18	19	3.645	103
	Figure 2D	WT (0-min off)	optoAKT (0-min off)	optoAKT (15-min off)	optoAKT (45-min off)	optoAKT (dark)	optoRaf (0-min off)
		1.76127	6.80526	1.70612	1.68732	1.53534	0.598121
		1.96269	2.21027	5.29525	0.119706	1.05243	1.9823
		0.317854	7.25385	4.24649	1.16315	3.10663	0.788098
		1.8536	5.14	3.83957	1.61787	1.46221	1.83113
		0.504562	3.27822	6.47515	1.90998	2.26624	-0.33624
		1.58845	2.60901	1.17173	1.72327	2.78592	0.734577
		0.187526	4.39112	3.66472	3.82078	0.898815	2.19474
		1.66853	2.17472	0.934768	4.84257	2.66866	1.24036
		0.721912	5.95792	1.82746	1.5762	3.80526	0.107449
		0.424486	3.43143	6.07477	4.58151	2.67152	0.453902
		0.569113	3.97603	2.24622	1.78782	3.2582	0.912297
		1.69754	1.99741	8.10813	1.10023	1.38132	1.34863
		1.52635	3.80607	1.80417	1.67343	1.28857	1.84911
		0.657769	4.1607	2.38758	2.34754	1.54433	3.43184
		1.37069	3.42612	1.09329	1.73553	5.22539	2.933
		0.535204	1.54719	3.67697	2.60084	2.60616	0.001226
		0.622225	5.71361	0.286804	1.73594		0.612829
		0.030233	4.72246	1.85851	0.70557		2.8521
			4.55064	3.00082	2.66703		0.101321
				2.97753	1.51532		0.687594
				4.31717			3.72396
				2.62699			1.09574
				1.80744			0.71415
		Mean	SEM	N
	WT (0-min off)	1	0.1546	18
	optoAKT (0-min off)	4.061	0.3714	19
	optoAKT (15-min off)	3.106	0.4085	23
	optoAKT (45-min off)	2.046	0.2651	20
	optoAKT (dark)	2.347	0.2902	16
	optoRaf (0-min off)	1.298	0.2342	23
	ANOVA table	SS	DF	MS	F (DFn, DFd)	P value
	Treatment (between columns)	128.6	5	25.73	F (5, 113) = 13.61	P < 0.0001
	Residual (within columns)	213.6	113	1.89
	Total	342.2	118
	Dunnett's multiple comparisons test	Mean Diff.	95.00% CI of diff.	Significant?	Summary
	optoAKT (dark) vs. WT (0-min off)	1.347	0.1434 to 2.551	Yes	*
	optoAKT (dark) vs. optoAKT (0-min off)	-1.713	-2.902 to -0.5244	Yes	**
	optoAKT (dark) vs. optoAKT (15-min off)	-0.7582	-1.899 to 0.3825	No	ns
	optoAKT (dark) vs. optoAKT (45-min off)	0.3017	-0.8736 to 1.477	No	ns
	optoAKT (dark) vs. optoRaf (0-min off)	1.049	-0.09158 to 2.190	No	ns
	Test details	Mean 1	Mean 2	Mean Diff.	SE of diff.	n1	n2	q	DF
	optoAKT (dark) vs. WT (0-min off)	2.347	1	1.347	0.4723	16	18	2.852	113
	optoAKT (dark) vs. optoAKT (0-min off)	2.347	4.061	-1.713	0.4665	16	19	3.673	113
	optoAKT (dark) vs. optoAKT (15-min off)	2.347	3.106	-0.7582	0.4475	16	23	1.694	113
	optoAKT (dark) vs. optoAKT (45-min off)	2.347	2.046	0.3017	0.4611	16	20	0.6544	113
	optoAKT (dark) vs. optoRaf (0-min off)	2.347	1.298	1.049	0.4475	16	23	2.344	113
	Figure 2F	WT	optoRaf (light)	optoRaf (dark)	optoAKT (light)	optoAKT (dark)
		30.9549	35.1056	23.5083	24.1526	31.9499
		28.8538	28.2661	25.0393	24.2444	20.5712
		26.1795	29.1351	25.1368	25.1501	27.6584
		23.905	30.6553	24.7296	23.275	25.3585
		24.1515	26.8947	29.6608	21.9835	26.1127
		26.9564	33.5765	31.4226	21.317	24.5347
		23.6912	32.0561	33.6963	26.6137	22.5308
		26.4523	33.5438	28.9775	20.4589	22.9246
		23.248	27.7553	24.9953	25.395	19.8451
		26.6134	28.86	28.8793	20.335	23.6679
		28.2739	31.4203	26.6735	25.0663	27.5846
		21.2452	28.3332	19.7663	22.1371	19.3382
		26.465	32.8953	28.1987	23.0303	27.1243
		21.5727	33.3721	22.5359	20.8763	23.9589
		25.5059	26.0697	23.9635	21.8055	30.7121
		26.5096	25.0175	22.5884	19.2279	29.5596
		19.9226	25.2333	25.4427	23.2176	32.2543
		24.0744	31.0122	29.8196	22.004	21.0575
		27.0383	29.6485	28.8788	23.0174	25.9569
		23.0835	27.6489	27.2527	25.0732	28.5724
		25.6908	24.1827	25.3825
		Mean	SEM	N
	WT	25.26	0.5809	21
	optoRaf (light)	29.56	0.6896	21
	optoRaf (dark)	26.5	0.7262	21
	optoAKT (light)	22.92	0.4418	20
	optoAKT (dark)	25.56	0.8714	20
	ANOVA table	SS	DF	MS	F (DFn, DFd)	P value
	Treatment (between columns)	476.1	4	119	F (4, 98) = 12.60	P < 0.0001
	Residual (within columns)	925.7	98	9.446
	Total	1402	102
	Dunnett's multiple comparisons test	Mean Diff.	95.00% CI of diff.	Significant?	Summary
	WT vs. optoRaf (light)	-4.3	-6.654 to -1.945	Yes	****
	WT vs. optoRaf (dark)	-1.246	-3.600 to 1.109	No	ns
	WT vs. optoAKT (light)	2.338	-0.04621 to 4.721	No	ns
	WT vs. optoAKT (dark)	-0.3071	-2.691 to 2.077	No	ns
	Test details	Mean 1	Mean 2	Mean Diff.	SE of diff.	n1	n2	q	DF
	WT vs. optoRaf (light)	25.26	29.56	-4.3	0.9485	21	21	4.533	98
	WT vs. optoRaf (dark)	25.26	26.5	-1.246	0.9485	21	21	1.313	98
	WT vs. optoAKT (light)	25.26	22.92	2.338	0.9603	21	20	2.434	98
	WT vs. optoAKT (dark)	25.26	25.56	-0.3071	0.9603	21	20	0.3198	98
	Figure 2G	WT	optoRaf (light)	optoRaf (dark)	optoAKT (light)	optoAKT (dark)
		737	719	548	649	749
		374	938	627	526	389
		368	671	572	609	708
		398	885	467	489	572
		566	794	670	662	642
		557	1118	703	430	526
		431	1242	778	544	637
		619	1074	946	355	598
		754	787	724	546	506
		579	844	884	371	544
		530	886	721	437	614
		732	1026	410	392	437
		684	821	669	370	518
		712	815	618	336	637
		437	780	580	333	515
		632	589	369	348	623
		582	708	558	291	426
		592	705	720	299	784
		500	942	565	309	577
		633	858	511	356	572
		721	771	533
		Mean	SEM	N
	WT	578	26.99	21
	optoRaf (light)	855.9	34.63	21
	optoRaf (dark)	627.3	31.19	21
	optoAKT (light)	432.6	26.59	20
	optoAKT (dark)	578.7	22.87	20
	ANOVA table	SS	DF	MS	F (DFn, DFd)	P value
	Treatment (between columns)	1942000	4	485415	F (4, 98) = 28.22	P < 0.0001
	Residual (within columns)	1686000	98	17199
	Total	3627000	102
	Dunnett's multiple comparisons test	Mean Diff.	95.00% CI of diff.	Significant?	Summary
	WT vs. optoRaf (light)	-277.9	-378.3 to -177.4	Yes	****
	WT vs. optoRaf (dark)	-49.29	-149.8 to 51.18	No	ns
	WT vs. optoAKT (light)	145.4	43.68 to 247.1	Yes	**
	WT vs. optoAKT (dark)	-0.7	-102.4 to 101.0	No	ns
	Test details	Mean 1	Mean 2	Mean Diff.	SE of diff.	n1	n2	q	DF
	WT vs. optoRaf (light)	578	855.9	-277.9	40.47	21	21	6.865	98
	WT vs. optoRaf (dark)	578	627.3	-49.29	40.47	21	21	1.218	98
	WT vs. optoAKT (light)	578	432.6	145.4	40.98	21	20	3.548	98
	WT vs. optoAKT (dark)	578	578.7	-0.7	40.98	21	20	0.01708	98
