# Supplementary material for: Optical control of ERK and AKT signaling promotes axon regeneration and functional recovery of PNS and CNS in Drosophila
Source: eLife. 2020 Oct 6;9:e57395. doi: 10.7554/eLife.57395 (PMC7567606; doi:10.7554/eLife.57395)
Supplement: Figure 3—figure supplement 2—source data 1. [file elife-57395-fig3-figsupp2-data1.xlsx]

## Sheet: Sheet1
	Figure3 supplement 2B	WT (light)	optoRaf + optoAKT (light)
	Regenerated	7	11
	Not regenerated	35	33
	Total	42	44
	Fisher's exact test	Significant?	P value (Two-sided)
	WT (light) vs. optoRaf + optoAKT (light)	No	0.43
	Figure3 supplement 2C	WT (light)	optoRaf + optoAKT (light)
		0.122171	0.038127
		0.066534	0.472975
		-0.04004	0.20888
		0.004891	-0.09483
		-0.1688	0.070437
		-0.21018	-0.12682
		-0.27766	-0.10364
		0.024427	-0.04471
		-0.5544	0.036781
		-0.14668	0.007912
		0.028663	0.207184
		-0.00563	-0.09886
		-0.0667	0.014142
		-0.16319	0.333579
		-0.1717	-0.18714
		-0.08629	0.148741
		0.085032	-0.10968
		0.195152	-0.12724
		0.208739	-0.27837
		0.348005	0.662591
		0.026825	-0.11156
		0.084268	-0.01197
		-0.06868	0.230021
		-0.06099	0.017872
		0.051765	-0.06759
		0.131408	-0.21786
		0.123454	0.175975
		-0.21942	2.05041
		-0.01783	0.020634
		-0.12742	-0.04918
		-0.30847	0.217097
		0.106167	0.141435
		-0.15857	0.958271
		-0.0373	0.000797
		0.408403	0.030552
		0.023182	-0.02867
		-0.07391	-0.10734
		0.099884	0.045913
		-0.11353	-0.21969
		-0.33223	-0.01099
		-0.10924	0.855461
		0.035441	0.171631
			-0.10673
			-0.28886
	Unpaired t test			How big is the difference?
	P value	0.0409		Mean ± SEM of optoRaf + optoAKT (light)	0.1074 ± 0.06009 N=44
	P value summary	*		Mean ± SEM of WT (light)	-0.03201 ± 0.02752 N=42
	Significantly different (P < 0.05)?	Yes		Difference between means	-0.1394 ± 0.06714
	One- or two-tailed P value?	Two-tailed		95% confidence interval	-0.2729 to -0.005894
	t, df	t=2.076 df=84		R squared (eta squared)	0.04882
