# Supplementary material for: Optical control of ERK and AKT signaling promotes axon regeneration and functional recovery of PNS and CNS in Drosophila
Source: eLife. 2020 Oct 6;9:e57395. doi: 10.7554/eLife.57395 (PMC7567606; doi:10.7554/eLife.57395)
Supplement: Figure 3—source data 1. [file elife-57395-fig3-data1.xlsx]

## Sheet: Sheet1
	Figure 3B	WT (light)	WT (dark)	optoRaf (light)	optoRaf (dark)	optoAKT (light)	optoAKT (dark)	optoRaf + optoAKT (light)
	Regenerated	26	27	30	25	47	29	48
	Not regenerated	7	14	6	11	5	12	3
	Total	33	41	36	36	52	41	51
	Fisher's exact test	Significant?	P value (Two-sided)
	WT (light) vs. WT (dark)	No	0.301
	WT (light) vs. optoRaf (light)	No	0.7608
	WT (light) vs. optoRaf (dark)	No	0.4219
	WT (light) vs. optoAKT (light)	No	0.2007
	WT (light) vs. optoAKT (dark)	No	0.5933
	WT (light) vs. optoRaf + optoAKT (light)	Yes	0.044
	Figure 3C	WT (light)	WT (dark)	optoRaf (light)	optoRaf (dark)	optoAKT (light)	optoAKT (dark)	optoRaf + optoAKT (light)
		0.047215	0.026637	0.355409	0.685592	1.5673	0.074969	0.392488
		0.078916	0.366578	0.448285	-0.06781	0.872489	0.031627	0.632582
		0.369552	0.499088	-0.05704	0.836487	2.2815	-0.23358	2.04028
		1.13779	0.155012	0.649698	0.647032	1.04719	0.714449	1.15597
		0.998292	0.653963	0.562158	0.263021	0.925203	0.010619	1.54725
		0.885857	0.253812	0.603435	-0.11519	0.969659	0.139176	1.0919
		0.168391	0.953304	-0.01993	-0.06206	1.44237	0.497983	0.756813
		0.564879	0.079264	-0.0371	-0.13871	0.320487	1.02322	0.898532
		0.52544	0.104328	-0.07224	1.23003	2.02106	-0.09764	1.48968
		0.571555	0.629754	-0.22307	0.598648	0.408055	1.41964	0.939633
		0.837223	0.053077	0.958302	-0.00464	0.304481	0.102726	-0.26986
		0.211209	-0.11705	0.493947	0.071282	0.88427	0.717585	1.28707
		0.301887	0.751041	2.22436	0.352511	1.01768	0.351193	0.3442
		0.227606	0.054715	0.891729	0.58124	0.647706	-0.04547	1.18238
		0.046542	0.412295	0.166408	-0.17049	0.6009	0.148673	1.27586
		0.342181	1.02503	0.522608	0.657211	1.11609	-0.18494	1.73975
		-0.04611	1.44562	0.96795	0.036242	1.10514	0.735033	0.861925
		0.32784	0.920026	0.42756	0.07398	-0.00734	0.396316	0.289924
		0.589271	0.570964	0.123702	-0.05208	0.124525	0.737768	0.474636
		0.880912	0.476959	0.635152	0.128151	0.295127	0.511186	1.0779
		-0.16969	0.956391	-0.0942	0.142244	0.384313	0.586399	-0.26437
		0.03087	-0.13125	0.82732	-0.39188	0.210466	1.55758	1.3399
		0.711547	1.14751	0.490389	-0.53636	0.230942	-0.25142	1.52701
		0.061057	-0.37303	1.11918	-0.19003	0.35977	0.621925	0.088929
		0.64231	0.055237	1.16751	0.851534	0.315457	0.554258	1.92988
		0.642048	0.120637	1.22201	0.204434	0.459752	-0.10959	0.465859
		-0.12212	-0.22402	0.965863	-0.39408	0.786087	0.529392	0.353861
		0.50257	0.77737	1.76872	0.618129	1.62252	0.32459	-0.00329
		0.287768	0.920757	0.345649	-0.34096	0.660721	0.401792	0.55789
		-0.06881	0.084971	2.37498	0.295474	-0.08016	0.379224	0.324913
		0.447217	0.121893	1.33218	1.23606	0.470089	0.019309	0.061652
		0.964543	0.409139	1.32539	0.301375	0.278937	-0.10602	-0.15124
		-0.42196	-0.58037	0.296226	0.833058	0.28721	-0.35125	0.160574
			0.026762	0.515322	0.314513	0.667848	0.775709	0.174313
			-0.41141	1.0874	0.796714	0.170212	0.825734	0.036572
			0.046643	1.20034	1.23253	1.27286	0.477495	1.5154
			0.614341			0.617418	1.48428	0.486758
			0.269565			1.01622	0.209677	0.886093
			0.196952			0.62767	0.163753	0.442871
			0.291908			0.456484	-0.20848	0.375034
			0.03979			1.00508	-0.20966	-0.03238
						1.23951		1.09882
						0.942144		1.54371
						1.03792		0.626099
						0.197491		0.438486
						2.23909		1.2366
						0.071655		0.265273
						0.933802		0.231397
						0.118887		1.0413
						0.527865		1.46574
						-0.03731		0.243651
						1.20601
		Mean	SEM	N
	WT (light)	0.381	0.06653	33
	WT (dark)	0.3335	0.07044	41
	optoRaf (light)	0.7102	0.1033	36
	optoRaf (dark)	0.2923	0.07978	36
	optoAKT (light)	0.7354	0.07755	52
	optoAKT (dark)	0.3592	0.07437	41
	optoRaf + AKT (light)	0.7387	0.0839	51
	ANOVA table	SS	DF	MS	F (DFn, DFd)	P value
	Treatment (between columns)	11.13	6	1.855	F (6, 283) = 6.797	P < 0.0001
	Residual (within columns)	77.23	283	0.2729
	Total	88.36	289
	Dunnett's multiple comparisons test	Mean Diff.	95.00% CI of diff.	Significant?	Summary
	WT (light) vs. WT (dark)	0.04751	-0.2679 to 0.3630	No	ns
	WT (light) vs. optoRaf (light)	-0.3291	-0.6542 to -0.004056	Yes	*
	WT (light) vs. optoRaf (dark)	0.08871	-0.2364 to 0.4138	No	ns
	WT (light) vs. optoAKT (light)	-0.3544	-0.6546 to -0.05417	Yes	*
	WT (light) vs. optoAKT (dark)	0.02187	-0.2936 to 0.3373	No	ns
	WT (light) vs. optoRaf + optoAKT (light)	-0.3577	-0.6591 to -0.05638	Yes	*
	Test details	Mean 1	Mean 2	Mean Diff.	SE of diff.	n1	n2	q	DF
	WT (light) vs. WT (dark)	0.381	0.3335	0.04751	0.1222	33	41	0.3889	283
	WT (light) vs. optoRaf (light)	0.381	0.7102	-0.3291	0.1259	33	36	2.614	283
	WT (light) vs. optoRaf (dark)	0.381	0.2923	0.08871	0.1259	33	36	0.7047	283
	WT (light) vs. optoAKT (light)	0.381	0.7354	-0.3544	0.1163	33	52	3.048	283
	WT (light) vs. optoAKT (dark)	0.381	0.3592	0.02187	0.1222	33	41	0.179	283
	WT (light) vs. optoRaf + optoAKT (light)	0.381	0.7387	-0.3577	0.1167	33	51	3.065	283
	Figure 3E	optoRaf (dark)	optoRaf (45-min off)	optoRaf (15-min off)	optoRaf (Con. on)	optoAKT (dark)	optoAKT (45-min off)	optoAKT (15-min off)	optoAKT (Con. on)
	Regenerated	25	27	32	30	29	41	35	47
	Not regenerated	11	19	4	6	12	8	5	5
	Total	36	46	36	36	41	49	40	52
	Fisher's exact test	Significant?	P value (Two-sided)
	optoRaf (dark) vs. optoRaf (45-min off)	No	0.3616
	optoRaf (dark) vs. optoRaf (15-min off)	No	0.0795
	optoRaf (dark) vs. optoRaf (Con. on)	No	0.2668
	optoAKT (dark) vs. optoAKT (45-min off)	No	0.203
	optoAKT (dark) vs. optoAKT (15-min off)	No	0.1004
	optoAKT (dark) vs. optoAKT (Con. on)	Yes	0.0285
	Figure 3F	optoRaf (dark)	optoRaf (45-min off)	optoRaf (15-min off)	optoRaf (Con. on)	optoAKT (dark)	optoAKT (45-min off)	optoAKT (15-min off)	optoAKT (light)
		0.685592	1.01024	1.77808	0.355409	0.074969	0.476116	0.782273	1.5673
		-0.06781	0.135663	1.14499	0.448285	0.031627	0.34062	0.549291	0.872489
		0.836487	0.55382	1.88153	-0.05704	-0.23358	0.654741	0.0903	2.2815
		0.647032	0.089466	0.178988	0.649698	0.714449	0.501804	0.279485	1.04719
		0.263021	0.634472	0.483889	0.562158	0.010619	-0.04075	0.75745	0.925203
		-0.11519	1.27285	1.25837	0.603435	0.139176	1.34486	1.91577	0.969659
		-0.06206	0.097587	0.20986	-0.01993	0.497983	-0.00787	1.84976	1.44237
		-0.13871	-0.19607	0.399573	-0.0371	1.02322	0.554221	-0.12452	0.320487
		1.23003	0.067559	0.17562	-0.07224	-0.09764	1.3086	0.344763	2.02106
		0.598648	0.058615	0.569629	-0.22307	1.41964	0.926292	0.667729	0.408055
		-0.00464	0.847378	-0.43445	0.958302	0.102726	1.10493	-0.06943	0.304481
		0.071282	0.016735	0.110298	0.493947	0.717585	0.28358	0.747373	0.88427
		0.352511	-0.05153	0.358393	2.22436	0.351193	0.13548	1.22313	1.01768
		0.58124	0.078436	0.849277	0.891729	-0.04547	0.811539	0.110925	0.647706
		-0.17049	0.67769	0.009896	0.166408	0.148673	0.556858	0.544249	0.6009
		0.657211	0.472832	0.329085	0.522608	-0.18494	0.011461	1.86008	1.11609
		0.036242	0.555664	0.495339	0.96795	0.735033	0.14931	0.336032	1.10514
		0.07398	-0.02467	-0.18801	0.42756	0.396316	-0.02908	-0.13191	-0.00734
		-0.05208	-0.08639	0.46105	0.123702	0.737768	0.037733	-0.30638	0.124525
		0.128151	0.177708	0.733915	0.635152	0.511186	0.055304	0.434916	0.295127
		0.142244	0.854514	0.903319	-0.0942	0.586399	0.048449	-0.19926	0.384313
		-0.39188	0.451919	0.897284	0.82732	1.55758	0.094271	0.345179	0.210466
		-0.53636	0.94616	0.20932	0.490389	-0.25142	0.769134	0.480348	0.230942
		-0.19003	0.163071	0.28538	1.11918	0.621925	1.47128	0.122336	0.35977
		0.851534	0.396879	0.275119	1.16751	0.554258	0.538783	0.744064	0.315457
		0.204434	0.479568	0.596922	1.22201	-0.10959	0.45503	0.410222	0.459752
		-0.39408	0.515819	1.46635	0.965863	0.529392	0.840488	0.233727	0.786087
		0.618129	0.355034	2.13861	1.76872	0.32459	1.45828	0.080542	1.62252
		-0.34096	0.233455	0.377296	0.345649	0.401792	0.5725	0.027649	0.660721
		0.295474	0.347242	0.523219	2.37498	0.379224	0.145147	0.086296	-0.08016
		1.23606	-0.09956	1.10213	1.33218	0.019309	1.27433	0.392749	0.470089
		0.301375	-0.05111	0.938872	1.32539	-0.10602	0.656826	0.707995	0.278937
		0.833058	-0.01571	0.499086	0.296226	-0.35125	0.370358	1.79019	0.28721
		0.314513	0.048392	0.047775	0.515322	0.775709	0.448498	1.74442	0.667848
		0.796714	-0.09066	1.28934	1.0874	0.825734	0.339253	1.54307	0.170212
		1.23253	-0.11113	0.512779	1.20034	0.477495	1.11799	0.876332	1.27286
			0.469415			1.48428	0.090011	1.10231	0.617418
			-0.49604			0.209677	0.652082	0.66303	1.01622
			-0.17291			0.163753	0.097324	0.770222	0.62767
			0.052082			-0.20848	0.041119	1.32959	0.456484
			0.297283			-0.20966	0.603932		1.00508
			0.168369				1.83662		1.23951
			0.1059				1.24751		0.942144
			0.069447				1.06847		1.03792
			0.035073				0.220616		0.197491
			0.031023				0.003944		2.23909
							0.02123		0.071655
							0.211883		0.933802
							0.158241		0.118887
									0.527865
									-0.03731
									1.20601
		Mean	SEM	N
	optoRaf (dark)	0.2923	0.07978	36
	optoRaf (45-min off)	0.2472	0.05321	46
	optoRaf (15-min off)	0.6352	0.09627	36
	optoRaf (Con. on)	0.7102	0.1033	36
	optoAKT (dark)	0.3592	0.07437	41
	optoAKT (45-min off)	0.5312	0.06963	49
	optoAKT (15-min off)	0.6278	0.09801	40
	optoAKT (Con. on)	0.7354	0.07755	52
	ANOVA table (optoRaf)	SS	DF	MS	F (DFn, DFd)	P value
	Treatment (between columns)	6.452	3	2.151	F (3, 150) = 8.270	P < 0.0001
	Residual (within columns)	39.01	150	0.26
	Total	45.46	153
	ANOVA table (optoAKT)	SS	DF	MS	F (DFn, DFd)	P value
	Treatment (between columns)	3.452	3	1.151	F (3, 178) = 3.984	P = 0.0089
	Residual (within columns)	51.41	178	0.2888
	Total	54.86	181
	Dunnett's multiple comparisons test	Mean Diff.	95.00% CI of diff.	Significant?	Summary
	optoRaf (dark) vs. optoRaf (45-min off)	0.0451	-0.2242 to 0.3144	No	ns
	optoRaf (dark) vs. optoRaf (15-min off)	-0.3429	-0.6282 to -0.05767	Yes	*
	optoRaf (dark) vs. optoRaf (Con. on)	-0.4178	-0.7031 to -0.1326	Yes	**
	optoAKT (dark) vs. optoAKT (45-min off)	-0.1721	-0.4416 to 0.09745	No	ns
	optoAKT (dark) vs. optoAKT (15-min off)	-0.2687	-0.5516 to 0.01433	No	ns
	optoAKT (dark) vs. optoAKT (Con. on)	-0.3762	-0.6422 to -0.1103	Yes	**
	Test details	Mean 1	Mean 2	Mean Diff.	SE of diff.	n1	n2	q	DF
	optoRaf (dark) vs. optoRaf (45-min off)	0.2923	0.2472	0.0451	0.1135	36	46	0.3975	150
	optoRaf (dark) vs. optoRaf (15-min off)	0.2923	0.6352	-0.3429	0.1202	36	36	2.853	150
	optoRaf (dark) vs. optoRaf (Con. on)	0.2923	0.7102	-0.4178	0.1202	36	36	3.476	150
	optoAKT (dark) vs. optoAKT (45-min off)	0.3592	0.5312	-0.1721	0.1137	41	49	1.513	178
	optoAKT (dark) vs. optoAKT (15-min off)	0.3592	0.6278	-0.2687	0.1194	41	40	2.249	178
	optoAKT (dark) vs. optoAKT (Con. on)	0.3592	0.7354	-0.3762	0.1122	41	52	3.352	178
	Figure 3H	WT (light)	optoRaf (light)	optoRaf (dark)	optoAKT (light)	optoAKT (dark)
	Regenerated	7	12	10	9	6
	Not regenerated	35	24	29	25	32
	Total	42	36	39	34	38
	Fisher's exact test	Significant?	P value (Two-sided)
	WT (light) vs. optoRaf (light)	No	0.1146
	WT (light) vs. optoRaf (dark)	No	0.4155
	WT (light) vs. optoAKT (light)	No	0.3979
	WT (light) vs. optoAKT (dark)	No	1
	Figure 3I	WT (light)	optoRaf (light)	optoRaf (dark)	optoAKT (light)	optoAKT (dark)
		0.122171	0.287634	0.00904064	-0.1938	0.180688
		0.066534	-0.3076	-0.196445	-0.01742	-0.09439
		-0.04004	0.02162	-0.098548	0.020158	0.14779
		0.004891	0.235588	-0.0548096	1.6528	-0.22263
		-0.1688	0.786735	-0.0652451	-0.01626	-0.2171
		-0.21018	0.105792	0.354634	-0.07556	-0.26258
		-0.27766	-0.01212	-0.121938	0.199177	-0.41928
		0.024427	0.079978	0.130361	-0.24915	0.015882
		-0.5544	0.10935	0.0044777	0.055573	-0.00395
		-0.14668	0.029261	0.198996	0.252721	-0.32292
		0.028663	0.475224	0.210145	0.162351	-0.1399
		-0.00563	-0.19354	0.15677	0.153093	-0.32281
		-0.0667	0.561692	0.11382	-0.08082	-0.70355
		-0.16319	0.427368	-0.0461337	-0.15849	-0.30329
		-0.1717	0.09948	-0.262124	-0.01998	0.402922
		-0.08629	0.132245	-0.00931509	-0.04422	0.129111
		0.085032	0.024298	-0.0729883	-0.09514	-0.19996
		0.195152	0.042996	-0.212219	0.130105	0.379538
		0.208739	0.0241	-0.0925803	0.464602	-0.11158
		0.348005	-0.09252	-0.120778	-0.05268	-0.36603
		0.026825	-0.25863	-0.332755	0.424347	-0.11596
		0.084268	0.135561	-0.0105883	0.829209	-0.10257
		-0.06868	0.093756	0.285587	0.007481	-0.04675
		-0.06099	-0.27503	-0.0872886	0.023286	-0.21942
		0.051765	0.340257	0.294577	-0.0157	-0.20306
		0.131408	0.524037	-0.0710275	0.057143	-0.06919
		0.123454	0.067936	0.00688653	0.573044	0.145586
		-0.21942	0.665596	-0.0453979	0.365137	0.100656
		-0.01783	-0.43934	0.153367	-0.1011	-0.05764
		-0.12742	0.176587	0.121227	0.438201	-0.16586
		-0.30847	0.494721	-0.141207	0.074731	0.09822
		0.106167	-0.06277	-0.0949233	0.097093	-0.06332
		-0.15857	0.185982	-0.135139	-0.01505	-0.10881
		-0.0373	-0.16633	-0.232113	-0.24088	0.020327
		0.408403	0.059122	0.348035		-0.23237
		0.023182	0.293333	0.697953		0.390601
		-0.07391		-0.211891		-0.06202
		0.099884		-0.252144		0.05323
		-0.11353		-0.121936
		-0.33223
		-0.10924
		0.035441
		Mean	SEM	N
	WT (light)	-0.03201	0.02752	42
	optoRaf (light)	0.1298	0.04637	36
	optoRaf (dark)	-9.378e-05	0.03331	39
	optoAKT (light)	0.1354	0.06161	34
	optoAKT (dark)	-0.08085	0.03679	38
	ANOVA table	SS	DF	MS	F (DFn, DFd)	P value
	Treatment (between columns)	1.397	4	0.3491	F (4, 184) = 5.435	P = 0.0004
	Residual (within columns)	11.82	184	0.06423
	Total	13.22	188
	Dunnett's multiple comparisons test	Mean Diff.	95.00% CI of diff.	Significant?	Summary
	WT (light) vs. optoRaf (light)	-0.1618	-0.3036 to -0.02000	Yes	*
	WT (light) vs. optoRaf (dark)	-0.03192	-0.1707 to 0.1069	No	ns
	WT (light) vs. optoAKT (light)	-0.1674	-0.3115 to -0.02339	Yes	*
	WT (light) vs. optoAKT (dark)	0.04884	-0.09093 to 0.1886	No	ns
	Test details	Mean 1	Mean 2	Mean Diff.	SE of diff.	n1	n2	q	DF
	WT (light) vs. optoRaf (light)	-0.03201	0.1298	-0.1618	0.05756	42	36	2.811	184
	WT (light) vs. optoRaf (dark)	-0.03201	-9.378e-05	-0.03192	0.05636	42	39	0.5663	184
	WT (light) vs. optoAKT (light)	-0.03201	0.1354	-0.1674	0.05847	42	34	2.863	184
	WT (light) vs. optoAKT (dark)	-0.03201	-0.08085	0.04884	0.05674	42	38	0.8608	184
