# Supplementary material for: Optical control of ERK and AKT signaling promotes axon regeneration and functional recovery of PNS and CNS in Drosophila
Source: eLife. 2020 Oct 6;9:e57395. doi: 10.7554/eLife.57395 (PMC7567606; doi:10.7554/eLife.57395)
Supplement: Figure 4—source data 1. [file elife-57395-fig4-data1.xlsx]

## Sheet: Sheet1
	Figure 4B	WT (light)	optoRaf (light)	optoRaf (dark)	optoAKT (light)	optoAKT (dark)
	ventral	4	1	2	3	4
	bidirectional	4	5	1	15	3
	dorsal	18	20	22	27	21
	correct trajectory (ventral + bidirectional)	8	6	3	18	7
	wrong trajectory (dorsal)	18	20	22	27	21
	total	26	26	25	45	28
	Fisher's exact test	Significant?	P value (Two-sided)
	WT (light) vs. optoRaf (light)	No	0.7554
	WT (light) vs. optoRaf (dark)	No	0.1729
	WT (light) vs. optoAKT (light)	No	0.6097
	WT (light) vs. optoAKT (dark)	No	0.7638
	Figure 4D	WT (dark)	WT (local 5 min)	WT (Con. on)	optoRaf (dark)	optoRaf (local 5 min)	optoRaf (Con. on)	optoAKT (dark)	optoAKT (local 5 min)	optoAKT (Con. on)
		0.718514	-1.08619	-0.952375	-0.17961	0.349993	-0.14839	-0.42357	-0.27256	-1.09121
		-0.16418	-0.77061	0.762341	0.077385	-0.43546	-0.95286	-1.03311	-0.02977	-0.93251
		-0.16227	-0.07284	-1.61301	-0.83151	2.48502	-0.9265	-0.13485	-0.0268	-0.77176
		0.000627	-1.06011	1.69862	-0.87149	-0.05057	0.175441	-0.50584	-0.48956	-0.55543
		-3.55653	-0.71716	0.398238	-0.9735	-0.39754	-0.93694	1.18505	0.293062	-1.03759
		-0.45868	-0.99023	0.0320409	-0.85647	0.628323	-0.51489	-0.75622	-0.55042	-0.97216
		-1.49385	-0.18783	0.293673	0.599815	-0.46773	-0.11416	-0.85225	0.433572	-0.90192
		0.024004	-0.74138	-0.720713	-0.3996	-0.29765	-0.80357	0.65566	-0.20724	-0.33831
		-0.58488	-0.21934	-0.909849	-0.92558	0.059647	-1.09161	-0.58192	-0.90763	0.166737
		-2.11036	-0.88739	0.828931	-0.4086	-0.20864	-0.64755	-1.70712	-0.66288	-0.22224
		-0.55115	-0.85257	-1.16705	-0.78775	0.758223	-0.94604	-0.40746	-0.72116	-0.30044
		-1.01746	-0.66553	-1.65211	-0.65606	-0.64988	-0.94039	-0.07214	-0.22602	-0.52296
		-0.88915	-0.0151	-0.984071	-2.35188	-0.55706	-0.9089	-0.38417	0.099933	-1.09008
		-1.03846	-0.16092	-0.790377	-0.52955	0.77526	-0.97751	-1.05536	-0.56438	-0.8904
		-1.08428	0.187541	-0.660199	-0.90234	0.153056	-1.5583	-1.38783	-1.03059	-0.43247
		-0.3323	-1.39575	-0.779776	-1.81818	0.989817	-0.98778	-0.36847	0.412966	-1.57226
		-0.85389	-0.80005	-0.933237	-1.92601	-0.60072	-0.76495	-0.73448	-0.59458	-0.81202
		-0.29481	-0.37159	-0.805528	-0.98402	-0.78752	-0.51644	-1.09378	-0.74193	-0.65088
		-0.71635	-0.01215	-2.05336	-0.64805	0.073561	-0.7207	-0.66787	-0.48844	0.297687
		-0.21981	-0.52539	-0.731899	-0.1573	-0.48733	-0.92408	-0.38319	0.635296	0.395908
		-0.0765	-0.17108	-0.693611	-0.9618	0.009422	-1.2898	-0.79721	0.04633	-0.95248
		-0.16145	-1.27922	-0.859755	-0.48312	0.281965	-0.59999	-0.38273	-0.06745	-0.30352
		1.05052	-0.57292	-0.918678	-0.22093	1.01883	-0.44308	-0.036	-0.4303	1.23862
		-1.21437	-1.10495	-0.409811	-0.66278	0.730345	-1.54848	-0.67606	0.871147	-1.16027
		-1.2866	0.040602	-0.652073	-0.5886	0.281602	0.963009	-0.85498	-0.44482	0.228425
		-0.49373	-0.59606	-0.798064	2.48278	-0.29356	-0.9095	-0.35034	-0.54811	-1.38108
		4.06578	-1.42433	-0.421192	-0.64732	-0.21406	-0.75851	0.155387	-0.69865	-0.13779
		-2.44805	-0.70534	-0.648477	0.183326	-0.27965	0.092087	-1.19098	-0.68384	0.159197
		-0.82673	-0.72838	-0.489721	-0.95291	-0.24168	-1.0915	0.279322	0.821541	-0.07447
		-1.74159	-0.15842	-0.446498	-1.3934	-0.41208	-0.70671	-1.05849	1.14083	-0.70231
		-0.71766	-0.78863	0.253286	-0.6589	0.607407	-0.77031	-1.16184	-0.15247	-0.9447
		0.642815	0.319017	1.48282	0.035263	0.16933	-2.62333	-0.77278	-0.81851	-0.9403
				-0.908406		-0.12724	0.117389	-0.6926	0.227911	-0.16186
						-0.95415	-0.54909		0.511351	-0.95581
						-0.24244	0.013458			-0.95581
							-0.06266			-0.58202
		Mean	SEM	N
	WT (dark)	-0.5623	0.2197	32
	WT (local 5 min)	-0.5786	0.08229	32
	WT (Con. on)	-0.4924	0.1433	33
	optoRaf (dark)	-0.6062	0.1453	32
	optoRaf (local 5 min)	0.04762	0.1123	35
	optoRaf (Con. on)	-0.7048	0.1015	36
	optoAKT (dark)	-0.553	0.1011	33
	optoAKT (local 5 min)	-0.1725	0.0956	34
	optoAKT (Con. on)	-0.5517	0.09644	36
	ANOVA table (WT)	SS	DF	MS	F (DFn, DFd)	P value
	Treatment (between columns)	0.1367	2	0.06836	F (2, 94) = 0.08424	P = 0.9193
	Residual (within columns)	76.28	94	0.8115
	Total	76.42	96
	ANOVA table (optoRaf)	SS	DF	MS	F (DFn, DFd)	P value
	Treatment (between columns)	11.68	2	5.842	F (2, 100) = 11.94	P < 0.0001
	Residual (within columns)	48.94	100	0.4894
	Total	60.62	102
	ANOVA table (optoAKT)	SS	DF	MS	F (DFn, DFd)	P value
	Treatment (between columns)	3.286	2	1.643	F (2, 100) = 5.013	P = 0.0084
	Residual (within columns)	32.77	100	0.3277
	Total	36.06	102
	Dunnett's multiple comparisons test	Mean Diff.	95.00% CI of diff.	Significant?	Summary
	WT (dark) vs. WT (local 5 min)	0.0163	-0.4895 to 0.5221	No	ns
	WT (dark) vs. WT (Con. on)	-0.06985	-0.5718 to 0.4321	No	ns
	optoRaf (dark) vs. optoRaf (local 5 min)	-0.6538	-1.038 to -0.2699	Yes	***
	optoRaf (dark) vs. optoRaf (Con. on)	0.0986	-0.2828 to 0.4800	No	ns
	optoAKT (dark) vs. optoAKT (local 5 min)	-0.3805	-0.6944 to -0.06661	Yes	*
	optoAKT (dark) vs. optoAKT (Con. on)	-0.001296	-0.3109 to 0.3083	No	ns
	Test details	Mean 1	Mean 2	Mean Diff.	SE of diff.	n1	n2	q	DF
	WT (dark) vs. WT (local 5 min)	-0.5623	-0.5786	0.0163	0.2252	32	32	0.07236	94
	WT (dark) vs. WT (Con. on)	-0.5623	-0.4924	-0.06985	0.2235	32	33	0.3126	94
	optoRaf (dark) vs. optoRaf (local 5 min)	-0.6062	0.04762	-0.6538	0.1711	32	35	3.821	100
	optoRaf (dark) vs. optoRaf (Con. on)	-0.6062	-0.7048	0.0986	0.17	32	36	0.5801	100
	optoAKT (dark) vs. optoAKT (local 5 min)	-0.553	-0.1725	-0.3805	0.1399	33	34	2.72	100
	optoAKT (dark) vs. optoAKT (Con. on)	-0.553	-0.5517	-0.001296	0.138	33	36	0.009395	100
