# Supplementary material for: Optical control of ERK and AKT signaling promotes axon regeneration and functional recovery of PNS and CNS in Drosophila
Source: eLife. 2020 Oct 6;9:e57395. doi: 10.7554/eLife.57395 (PMC7567606; doi:10.7554/eLife.57395)
Supplement: Figure 5—source data 1. [file elife-57395-fig5-data1.xlsx]

## Sheet: Sheet1
	Figure 5B	WT (light)	optoRaf (light)	optoRaf (dark)	optoAKT (light)	optoAKT (dark)
	Regenerated	5	13	4	7	7
	Not regenerated	27	23	28	19	27
	Total	32	36	32	26	34
	Fisher's exact test	Significant?	P value (Two-sided)
	WT (light) vs. optoRaf (light)	No	0.0971
	WT (light) vs. optoRaf (dark)	No	1
	WT (light) vs. optoAKT (light)	No	0.3415
	WT (light) vs. optoAKT (dark)	No	0.7524
	Figure 5C	WT (light)	optoRaf (light)	optoRaf (dark)	optoAKT (light)	optoAKT (dark)
		0.798231	6.6063	2.66504	0.5456	2.19196
		1.2922	6.59964	3.10914	4.11814	4.6317
		4.68821	6.89385	0.9385	10.093	4.73472
		2.86768	3.44154	3.16308	3.62547	5.3193
		2.50226	7.56715	2.72546	1.50777	0.227638
		1.05032	5.4909	1.84083	3.13752	1.38237
		1.95703	2.982	4.24	3.56408	1.2882
		3.99958	4.57535	3.69976	5.61907	4.26426
		3.89578	5.06017	2.24148	4.95871	2.91731
		0.401459	7.46243	3.92837	4.61288	4.03501
		2.50478	4.12714	2.8091	7.79085	1.25398
		6.63532	6.21134	1.66722	2.64622	4.47642
		0.548346	5.73538	3.25644	5.70328	3.07181
		4.73106	5.2454	2.10004	5.3033	2.32943
		2.43905	6.95873	3.11441	3.65219	3.54507
		1.41527	5.73691	2.23709	9.00061	0.517168
		3.13018	7.96486	0.408145	4.56288	2.69292
		7.09602	6.31195	1.43401	5.95328	4.34246
		4.61505	3.59446	3.65694	3.60883	1.34358
		4.45299	6.63011	3.1501	6.99148	2.24183
		3.48395	6.68978	10.014	2.07909	1.03282
		2.75323	11.7157	3.30836	6.71608	1.87134
		0.291059	4.01898	2.96303	4.2157	1.18955
		1.47557	4.86951	6.08619	4.54714	2.7659
		3.23217	4.1656	1.54491	4.4215	2.55788
		2.34998	4.29416	1.21539	4.91738	4.14952
		1.43943	1.91917	0.463492		2.32051
		1.59269	8.85519	1.29283		5.89049
		0.383313	5.57698	2.45289		0.901022
		3.1108	3.43235	1.78358		6.02105
		1.34847	5.87378	0.529425		2.48928
		2.10424	5.63954	2.38417		3.80563
			3.27554			2.34732
			2.38901			2.72944
			3.62376
			1.97237
		Mean	SEM	N
	WT (light)	2.643	0.305	32
	optoRaf (light)	5.375	0.3391	36
	optoRaf (dark)	2.701	0.3192	32
	optoAKT (light)	4.765	0.4236	26
	optoAKT (dark)	2.849	0.2636	34
	ANOVA table	SS	DF	MS	F (DFn, DFd)	P value
	Treatment (between columns)	222.5	4	55.63	F (4, 155) = 16.18	P < 0.0001
	Residual (within columns)	532.8	155	3.438
	Total	755.4	159
	Dunnett's multiple comparisons test	Mean Diff.	95% CI of diff.	Significant?	Summary
	WT (light) vs. optoRaf (light)	-2.732	-3.843 to -1.620	Yes	****
	WT (light) vs. optoRaf (dark)	-0.05743	-1.201 to 1.086	No	ns
	WT (light) vs. optoAKT (light)	-2.122	-3.330 to -0.9139	Yes	***
	WT (light) vs. optoAKT (dark)	-0.2061	-1.333 to 0.9207	No	ns
	Test details	Mean 1	Mean 2	Mean Diff.	SE of diff.	n1	n2	q	DF
	WT (light) vs. optoRaf (light)	2.643	5.375	-2.732	0.4505	32	36	6.065	155
	WT (light) vs. optoRaf (dark)	2.643	2.701	-0.05743	0.4635	32	32	0.1239	155
	WT (light) vs. optoAKT (light)	2.643	4.765	-2.122	0.4895	32	26	4.334	155
	WT (light) vs. optoAKT (dark)	2.643	2.849	-0.2061	0.4567	32	34	0.4513	155
