# Supplementary material for: Optical control of ERK and AKT signaling promotes axon regeneration and functional recovery of PNS and CNS in Drosophila
Source: eLife. 2020 Oct 6;9:e57395. doi: 10.7554/eLife.57395 (PMC7567606; doi:10.7554/eLife.57395)
Supplement: Figure 6—source data 1. [file elife-57395-fig6-data1.xlsx]

## Sheet: Sheet1
	Figure 6B	WT (light)		optoRaf (light)		optoRaf (dark)		optoAKT (light)		optoAKT (dark)		WT uninjured
		24 h AI	48h AI	24 h AI	48h AI	24 h AI	48h AI	24 h AI	48h AI	24 h AI	48h AI	24 h AI	48h AI
	L1	0	0	0	3	0	0	0	3	0	0	3	3
	L2	0	0	0	2	0	2	0	0	0	1	3	3
	L3	0	0	0	3	0	0	0	0	0	0	3	3
	L4	0	1	0	0	0	0	0	3	0	2	3	3
	L5	0	0	0	3	0	0	0	0	0	0	3	3
	L6	0	0	0	0	0	1	0	3	0	0	3	3
	L7	0	0	0	1	0	0	0	2	0	1	2	3
	L8	0	3	0	3	0	1	0	0	0	0	1	2
	L9	0	0	0	0	0	2	0	2	0	2	3	3
	L10	0	0	0	0	0	0	0	0	0	3	0	2
	L11	0	0	0	3	0	0	0	3	0	0	0	3
	L12	0	3	0	0	0	3	0	1	0	0	3	3
	L13	0	0	0	3	0	0	0	0	0	0	2	3
	L14	0	2	0	0	0	3	0	3	0	1	3	3
	L15	0	0	0	0	0	0	0	0	0	0	1	3
	L16	0	3	0	3	0	1	0	1	0	0
	L17	0	0	0	0	0	0	0	0	0	1
	L18	0	0	0	0	0	3	0	3	0	3
	L19	0	1	0	0	0	3	0	2	0	0
	L20	0	0	0	0	0	0	0	2	0	0
	L21	0	0	0	3	0	0	0	2	0	1
	L22	0	0	0	3	0	1	0	0	0	3
	L23			0	0	0	0	0	1	0	0
	L24			0	3			0	0	0	1
	L25			0	3			0	3	0	0
	L26			0	2			0	3	0	0
	L27			0	3					0	1
	L28			0	0					0	0
	L29			0	2
	L30			0	3
	L31			0	0
	L32			0	0
	ANOVA table	SS	DF	MS	F (DFn, DFd)	P value
	Interaction	8.473	4	2.118	F (4, 252) = 2.812	P = 0.0260
	Row Factor	65.23	1	65.23	F (1, 252) = 86.57	P < 0.0001
	Column Factor	8.473	4	2.118	F (4, 252) = 2.812	P = 0.0260
	Residual	189.9	252	0.7534
	Tukey's multiple comparisons test	Mean Diff.	95% CI of diff.	Significant?	Summary
	24 h AI
	WT (light) vs. optoRaf (light)	0	-0.6605 to 0.6605	No	ns
	WT (light) vs. optoRaf (dark)	0	-0.7112 to 0.7112	No	ns
	WT (light) vs. optoAKT (light)	0	-0.6909 to 0.6909	No	ns
	WT (light) vs. optoAKT (dark)	0	-0.6795 to 0.6795	No	ns
	48 h AI
	WT (light) vs. optoRaf (light)	-0.8466	-1.507 to -0.1861	Yes	**
	WT (light) vs. optoRaf (dark)	-0.2787	-0.9899 to 0.4326	No	ns
	WT (light) vs. optoAKT (light)	-0.8322	-1.523 to -0.1413	Yes	**
	WT (light) vs. optoAKT (dark)	-0.1234	-0.8028 to 0.5561	No	ns
	Test details	Mean 1	Mean 2	Mean Diff.	SE of diff.	N1	N2	q	DF
	24 h AI
	WT (light) vs. optoRaf (light)	0	0	0	0.2404	22	32	0	252
	WT (light) vs. optoRaf (dark)	0	0	0	0.2589	22	23	0	252
	WT (light) vs. optoAKT (light)	0	0	0	0.2514	22	26	0	252
	WT (light) vs. optoAKT (dark)	0	0	0	0.2473	22	28	0	252
	48 h AI
	WT (light) vs. optoRaf (light)	0.5909	1.438	-0.8466	0.2404	22	32	4.98	252
	WT (light) vs. optoRaf (dark)	0.5909	0.8696	-0.2787	0.2589	22	23	1.522	252
	WT (light) vs. optoAKT (light)	0.5909	1.423	-0.8322	0.2514	22	26	4.68	252
	WT (light) vs. optoAKT (dark)	0.5909	0.7143	-0.1234	0.2473	22	28	0.7056	252
	Figure 6C	WT (light)	optoRaf (light)	optoRaf (dark)	optoAKT (light)	optoAKT (dark)
	Recovered	4	16	6	14	5
	Not recovered	18	16	17	12	23
	Total	22	32	23	26	28
	Fisher's exact test	Significant?	P value (Two-sided)
	WT (light) vs. optoRaf (light)	Yes	0.023
	WT (light) vs. optoRaf (dark)	No	0.7222
	WT (light) vs. optoAKT (light)	Yes	0.0167
	WT (light) vs. optoAKT (dark)	No	1
